# Supplementary material for: Tetanus and Diphtheria Seroprotection among Children Younger Than 15 Years in Nigeria, 2018: Who Are the Unprotected Children?
Source: MDPI journal article supplement (doi:10.3390/vaccines11030663), 2023-03-15
Supplement: s1 [file s1]

**Table S1.** Long term tetanus and diphtheria seroprotection among children aged <15 years, Nigeria 2018

|                  |       | Tetanus $\geq 1$ IU/ml |         | Diphtheria $\geq 1$ IU/ml |         |
|------------------|-------|------------------------|---------|---------------------------|---------|
|                  | N     | Percentage<br>(95%CI)  | p-value | Percentage<br>(95%CI)     | p-value |
| <b>Overall</b>   | 31456 | 15.1 (14.5-15.7)       |         | 6.0 (5.7-6.4)             |         |
| <b>Age group</b> |       |                        |         |                           |         |
| 0 - 4            | 9487  | 11.6 (10.9-12.4)       | <0.0001 | 5.2 (4.7-5.7)             | <0.0001 |
| 5 - 9            | 12435 | 12.7 (11.9-13.5)       |         | 5.7 (5.2-6.2)             |         |
| 10 - 14          | 9534  | 20.4 (19.3-21.4)       |         | 7.1 (6.5-7.7)             |         |
| <b>Sex</b>       |       |                        |         |                           |         |
| Female           | 15425 | 13.5 (12.8-14.2)       | <0.0001 | 5.5 (5.1-5.9)             | <0.001  |
| Male             | 16031 | 16.6 (15.8-17.4)       |         | 6.5 (6.1-7.0)             |         |
| <b>Zone</b>      |       |                        |         |                           |         |
| Northcentral     | 4634  | 20.6 (18.9-22.4)       | <0.0001 | 7.0 (6.1-7.9)             | <0.001  |
| Northeast        | 5045  | 12.4 (11.1-13.9)       |         | 4.7 (4.0-5.6)             |         |
| Northwest        | 8784  | 8.9 (7.8-10.0)         |         | 5.9 (5.3-6.6)             |         |
| South-south      | 4387  | 16.1 (14.8-17.6)       |         | 7.1 (6.3-8.1)             |         |
| Southeast        | 4000  | 29.5 (27.6-31.5)       |         | 6.1 (5.3-7.0)             |         |
| Southwest        | 4606  | 15.0 (13.6-16.5)       |         | 5.9 (5.1-6.8)             |         |
| <b>Location</b>  |       |                        |         |                           |         |
| Urban            | 13008 | 17.4 (16.4-18.5)       | <0.0001 | 6.0 (5.5-6.5)             | 0.91    |
| Rural            | 18448 | 13.2 (12.5-14.0)       |         | 6.0 (5.6-6.5)             |         |
